# Supplementary figures and images for: SARS-CoV-2 N501Y Introductions and Transmissions in Switzerland from Beginning of October 2020 to February 2021—Implementation of Swiss-Wide Diagnostic Screening and Whole Genome Sequencing
Source: MDPI journal article supplement (doi:10.3390/microorganisms9040677), 2021-03-25

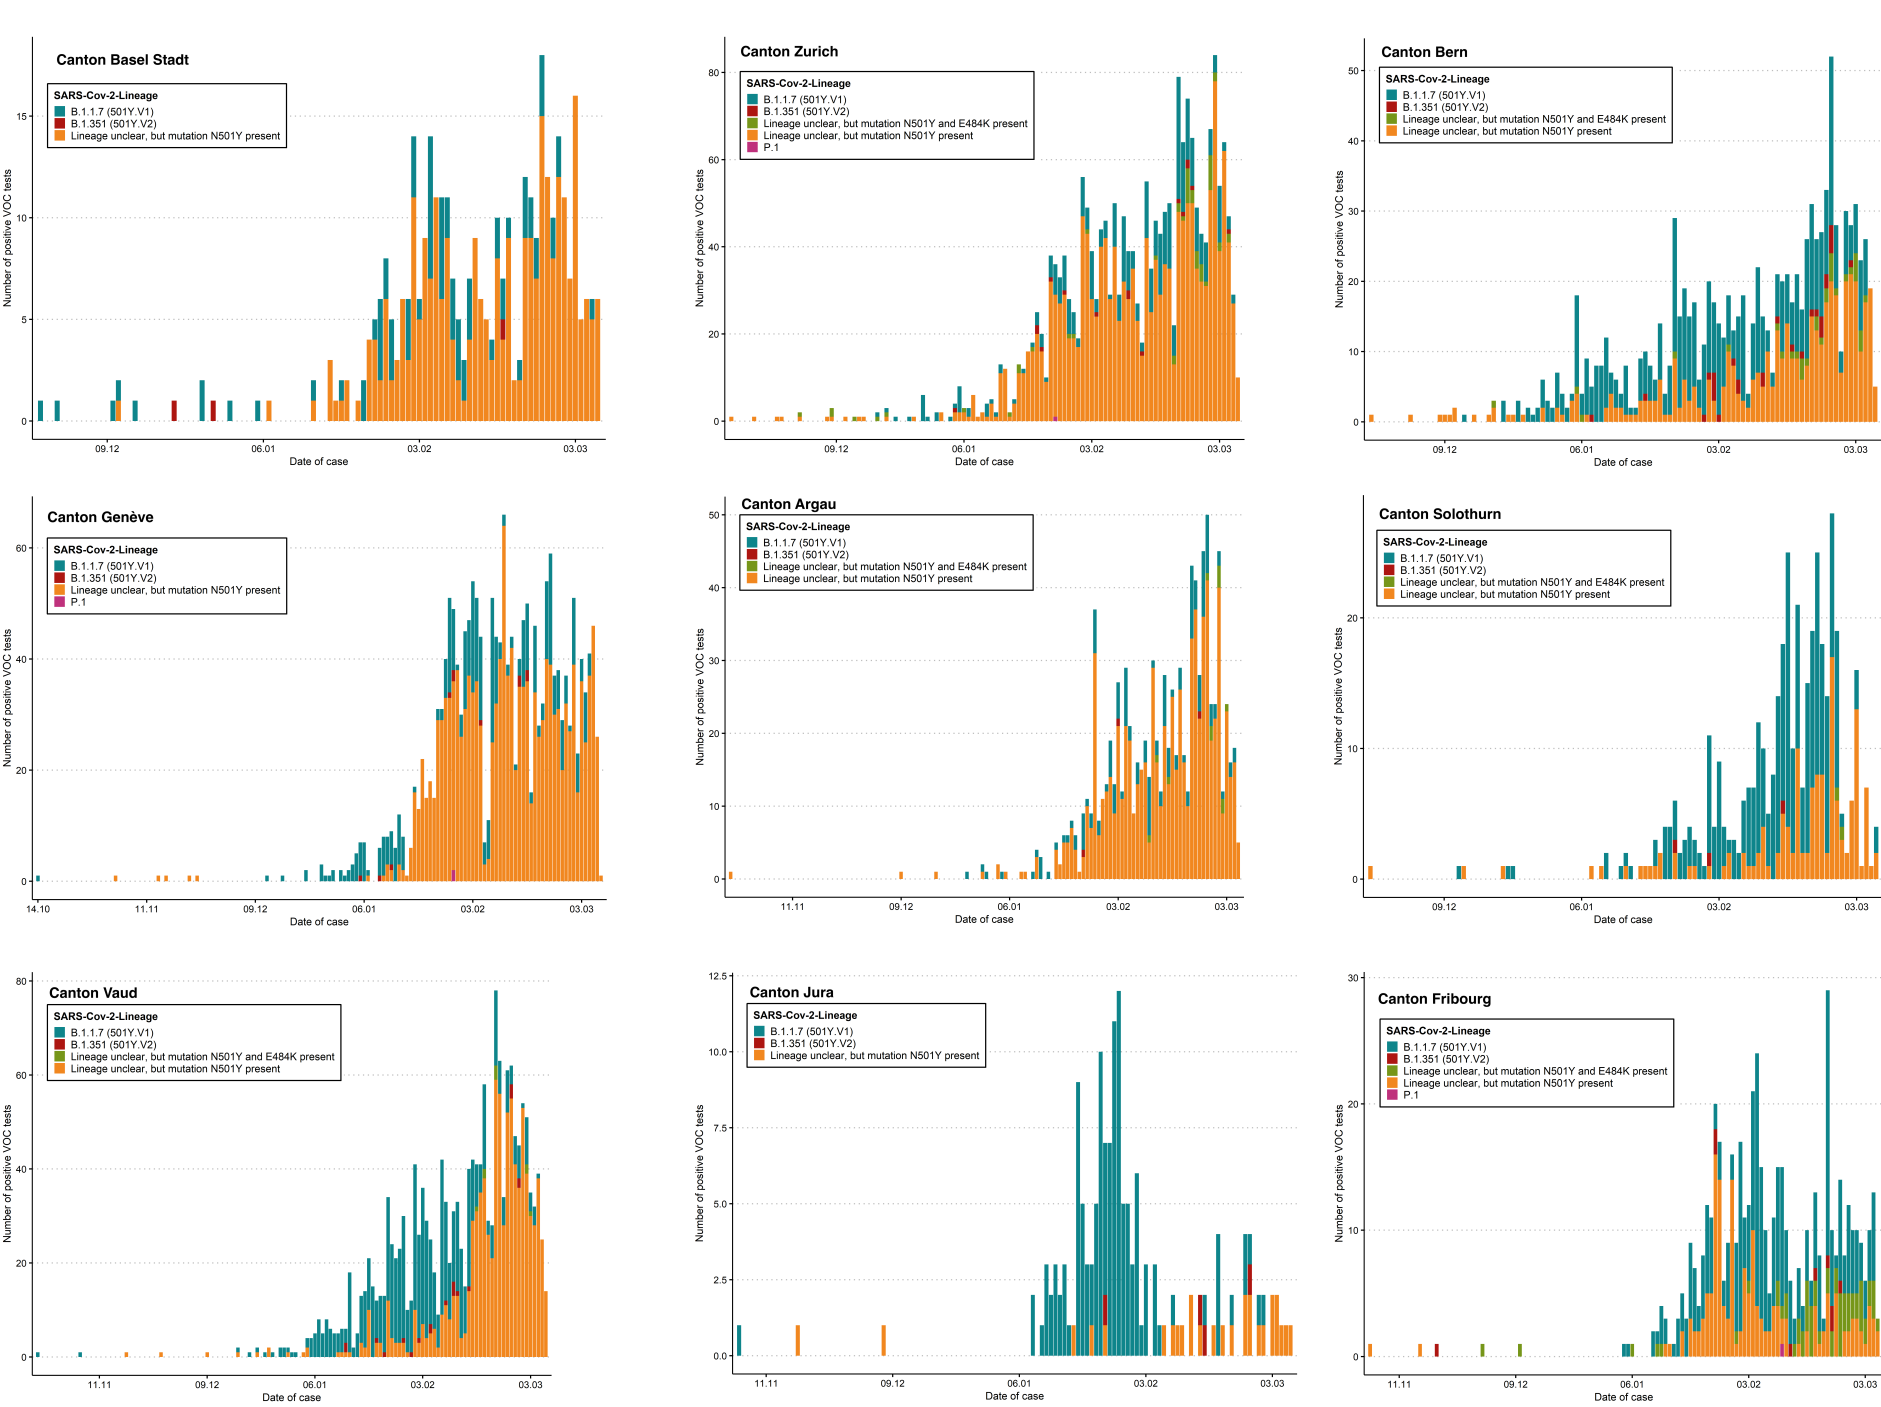

Supplement: s1 [file s1]
